# Supplementary material for: Modeling the aerosol chemical composition of the tropopause over the Tibetan Plateau during the Asian summer monsoon
Source: Copernicus journal article supplement (doi:10.5194/acp-19-11587-2019), 2019-09-13
Supplement: Supplementary file 1 [file acp-19-11587-2019-supplement.pdf]

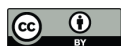

*Supplement of*

## **Modeling the aerosol chemical composition of the tropopause over the Tibetan Plateau during the Asian summer monsoon**

**Jianzhong Ma et al.**

*Correspondence to:* Jianzhong Ma ([majz@cma.gov.cn](mailto:majz@cma.gov.cn))

The copyright of individual parts of the supplement might differ from the CC BY 4.0 License.

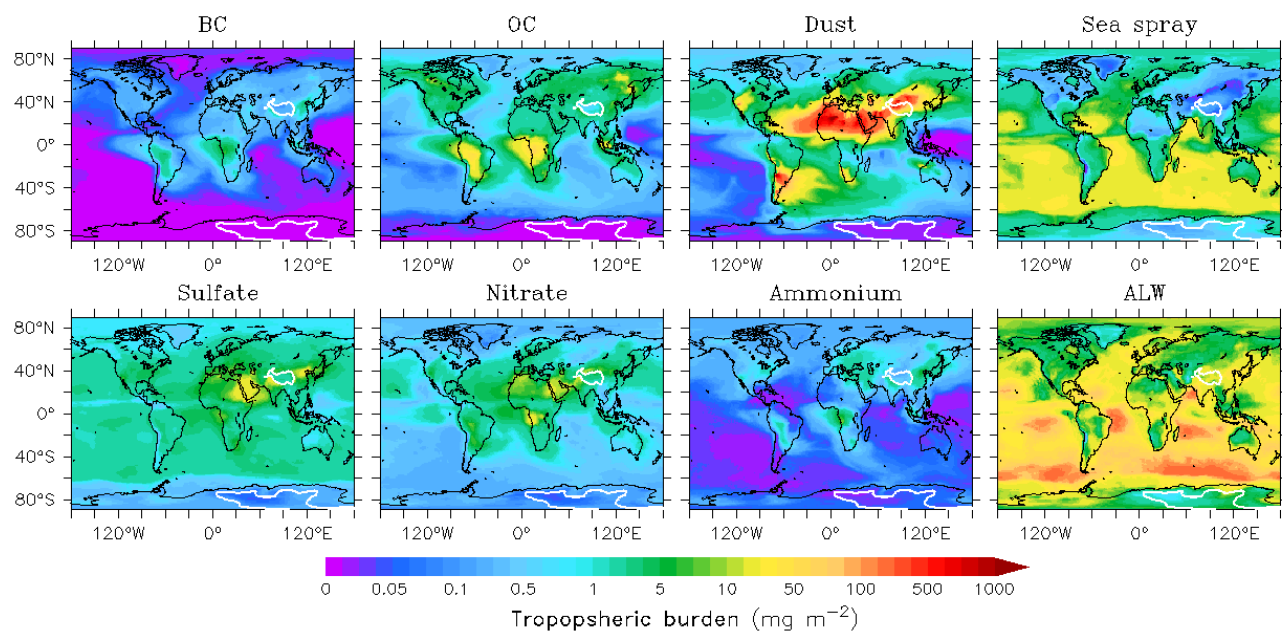

**Figure S1.** Same as Fig. 3, but for the year 2010.

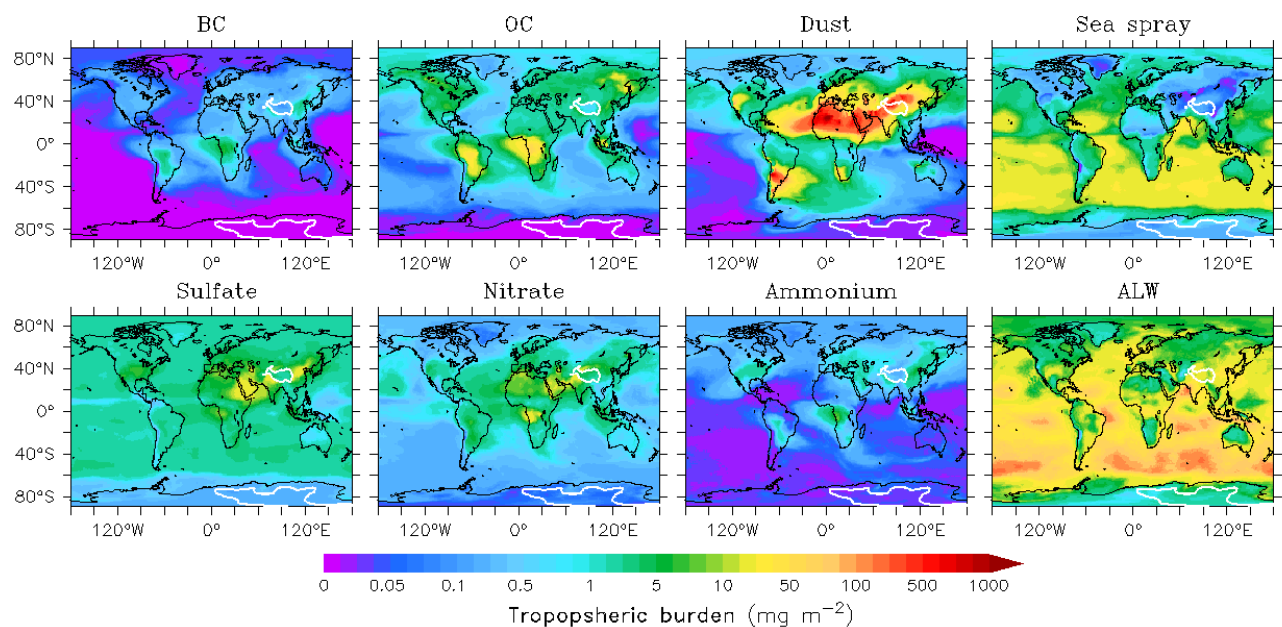

**Figure S2.** Same as Fig. 3, but for the year 2011.

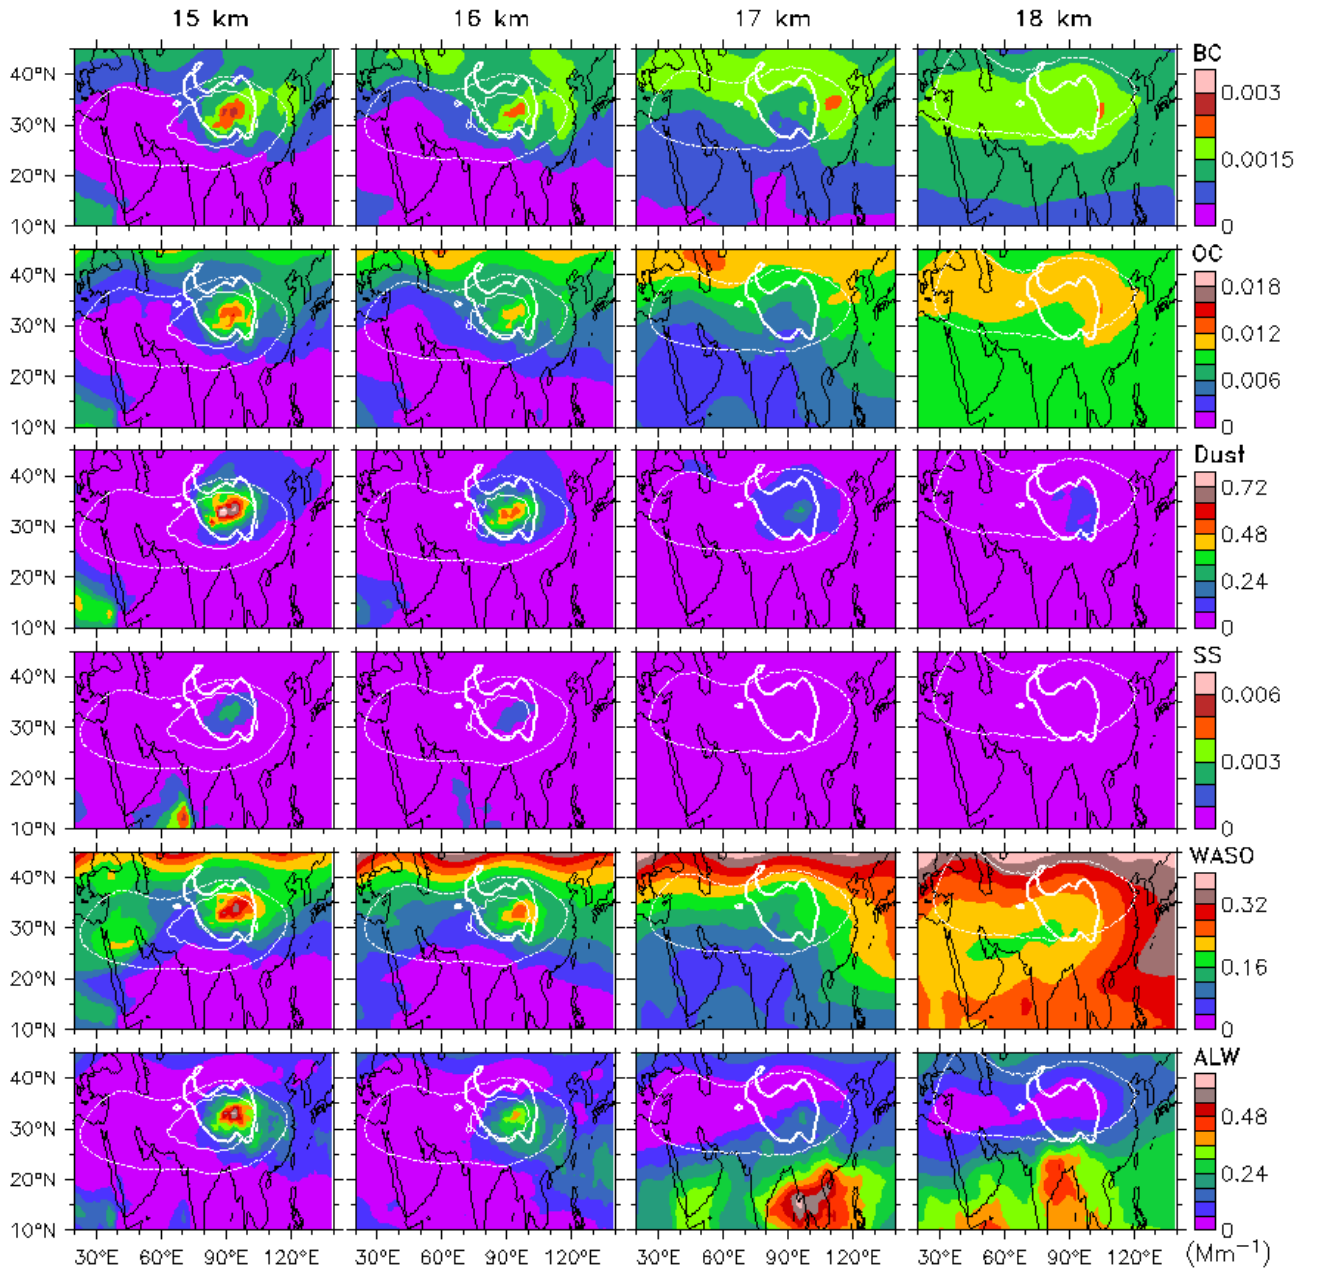

**Figure S3.** EMAC simulated aerosol extinction coefficients at 550 nm wavelength,  $K_e$ , in units of  $\text{Mm}^{-1}$  (1  $\text{Mm} = 10^6$  m), attributed to BC, OC, dust, sea spray (SS), WASO (i.e.,  $\text{SO}_4^{2-}$ ,  $\text{NO}_3^-$  and  $\text{NH}_4^+$  ions) and ALW (**first to sixth row**), at altitudes of 15, 16, 17 and 18 km a.s.l. (**first to fourth column**), averaged for July–August 2010. Thin white lines indicate the anticyclone area, with the same index as used in Fig. 2, and thick white lines highlight the Tibetan Plateau area.

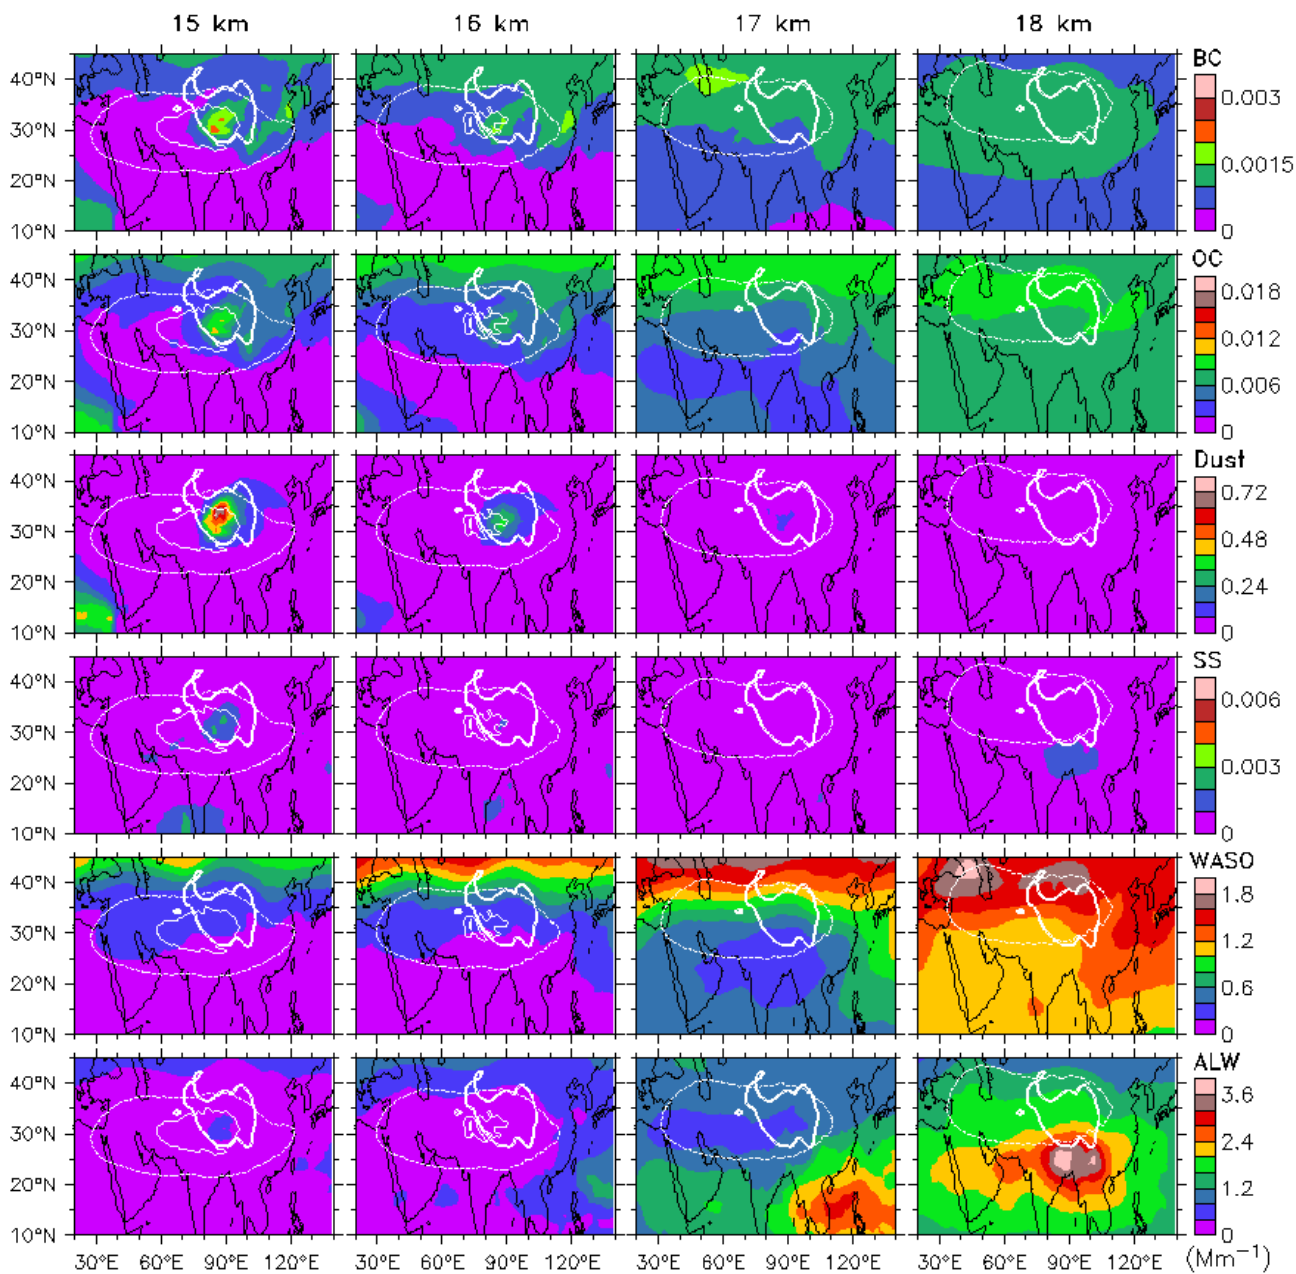

**Figure S4.** Same as Fig. S3, but for the year 2011.

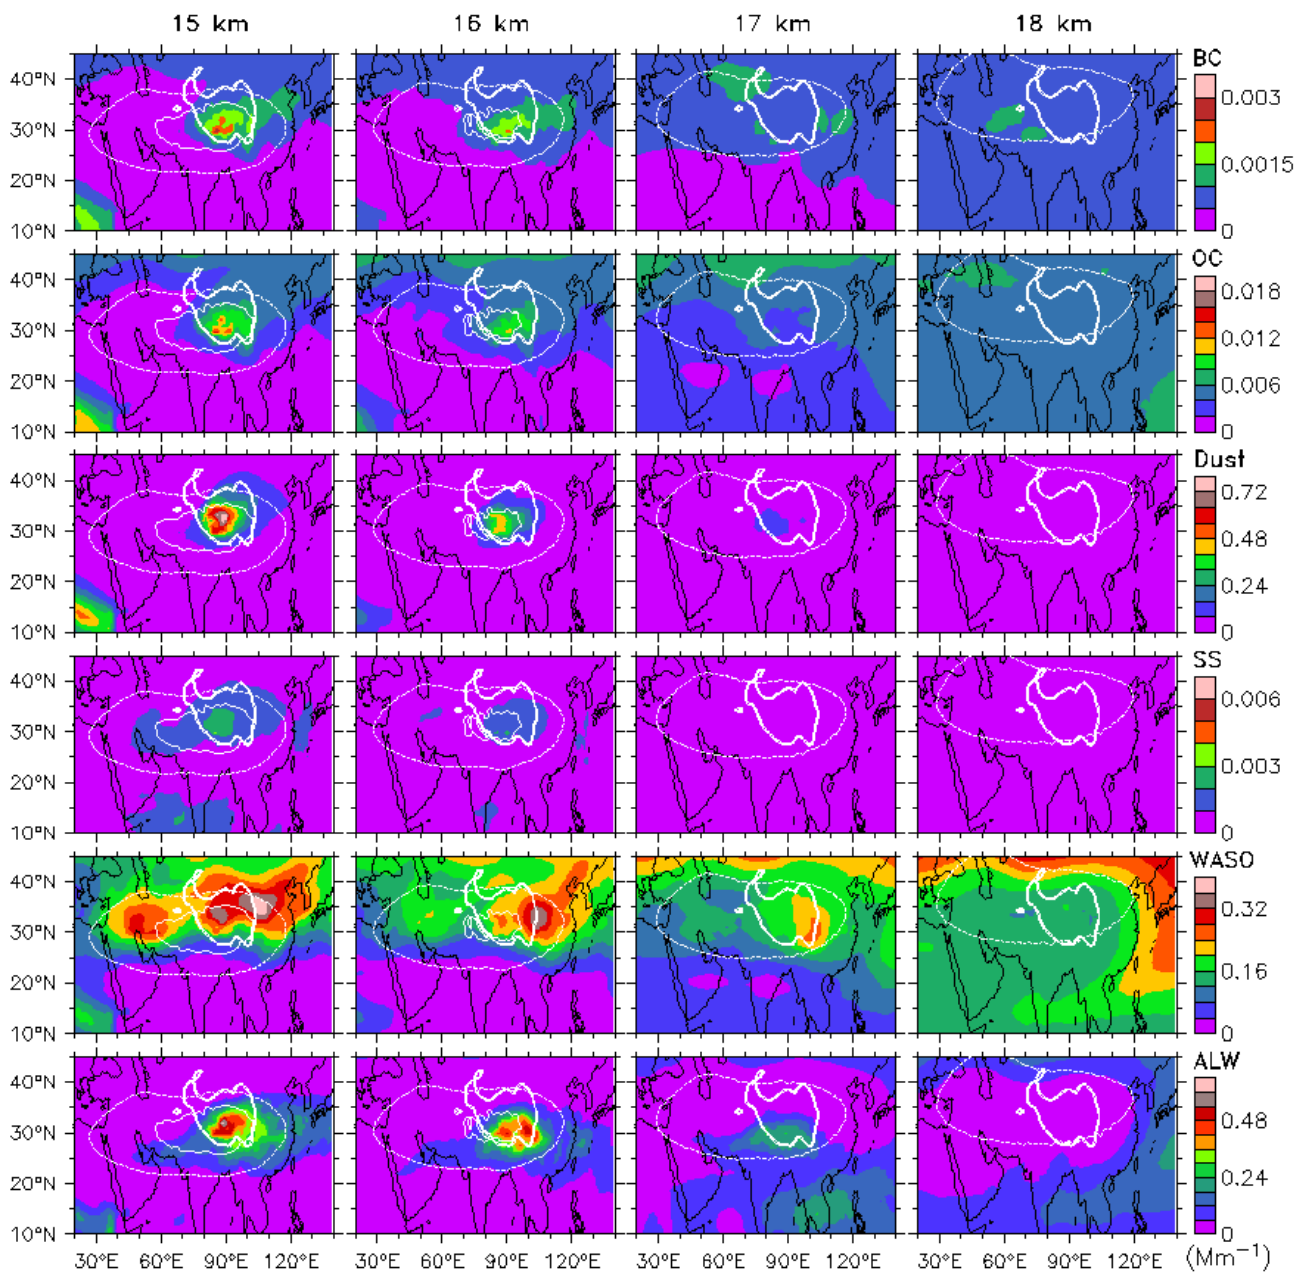

**Figure S5.** Same as Fig. S3, but for the year 2012.



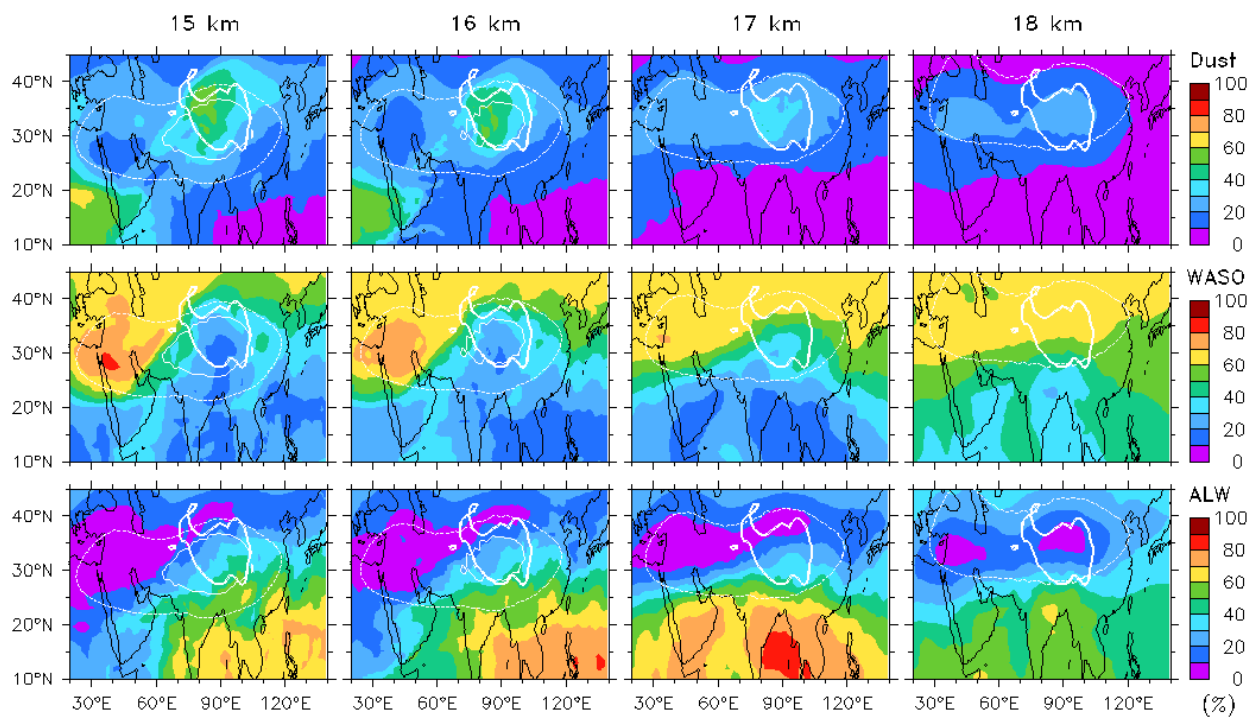

**Figure S6.** Same as Fig. 6, but for the year 2010.

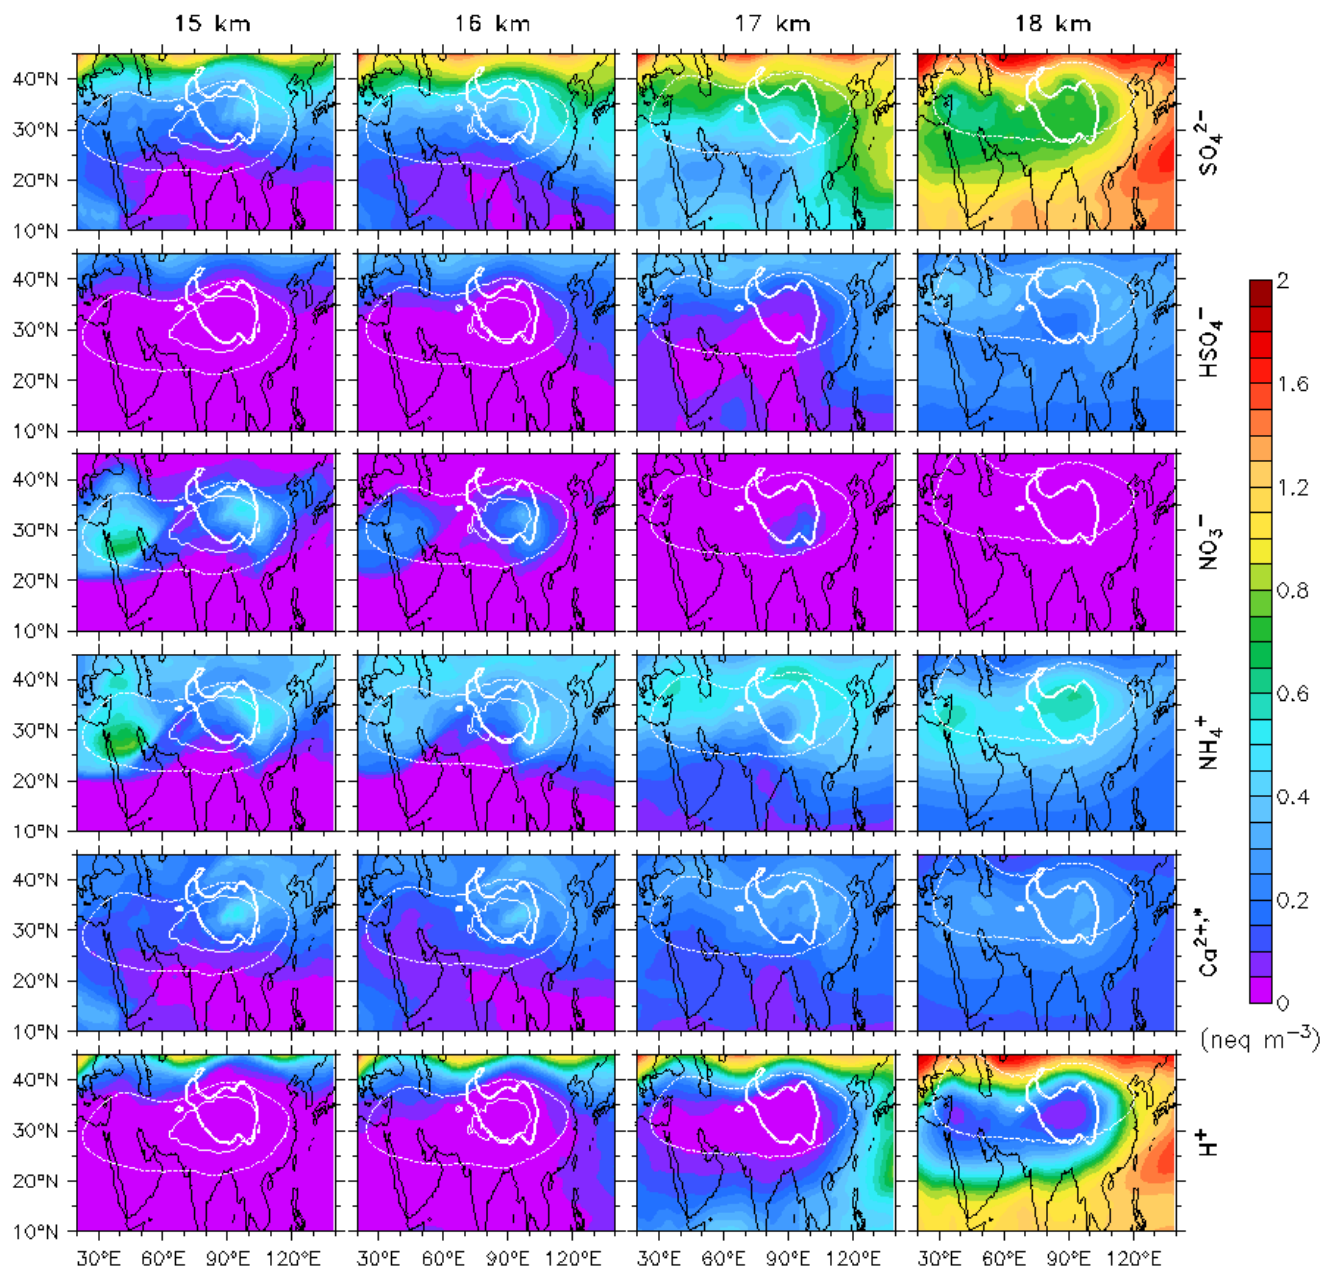

**Figure S7.** Same as Fig. 8, but for the year 2010.

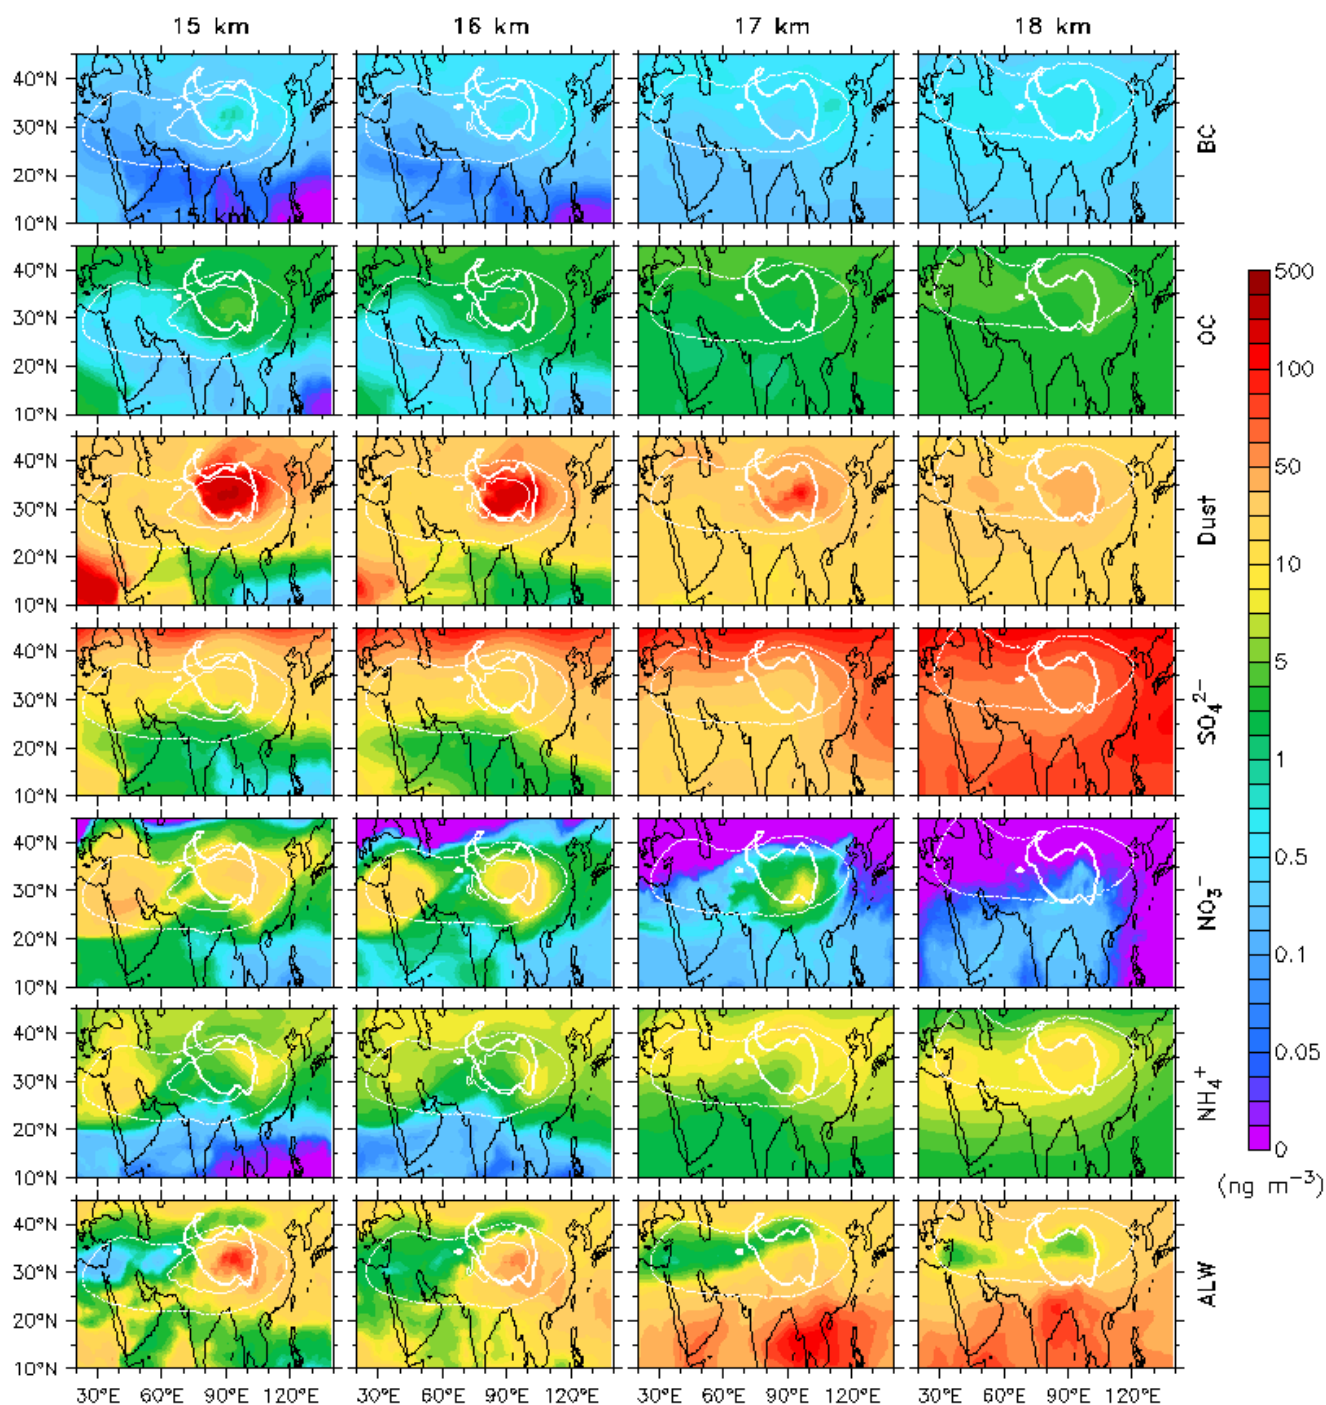

**Figure S8.** Same as Fig. 10, but for the year 2010.



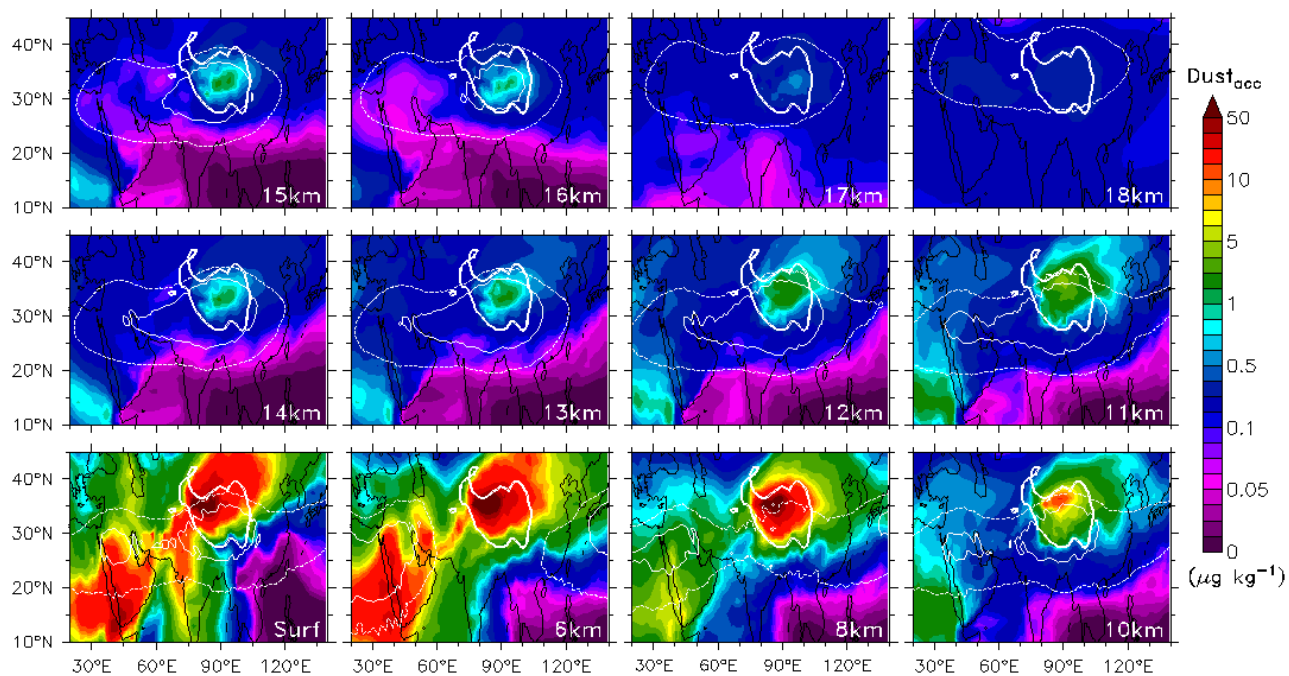

**Figure S9.** Same as Fig. 12, but for the year 2010.

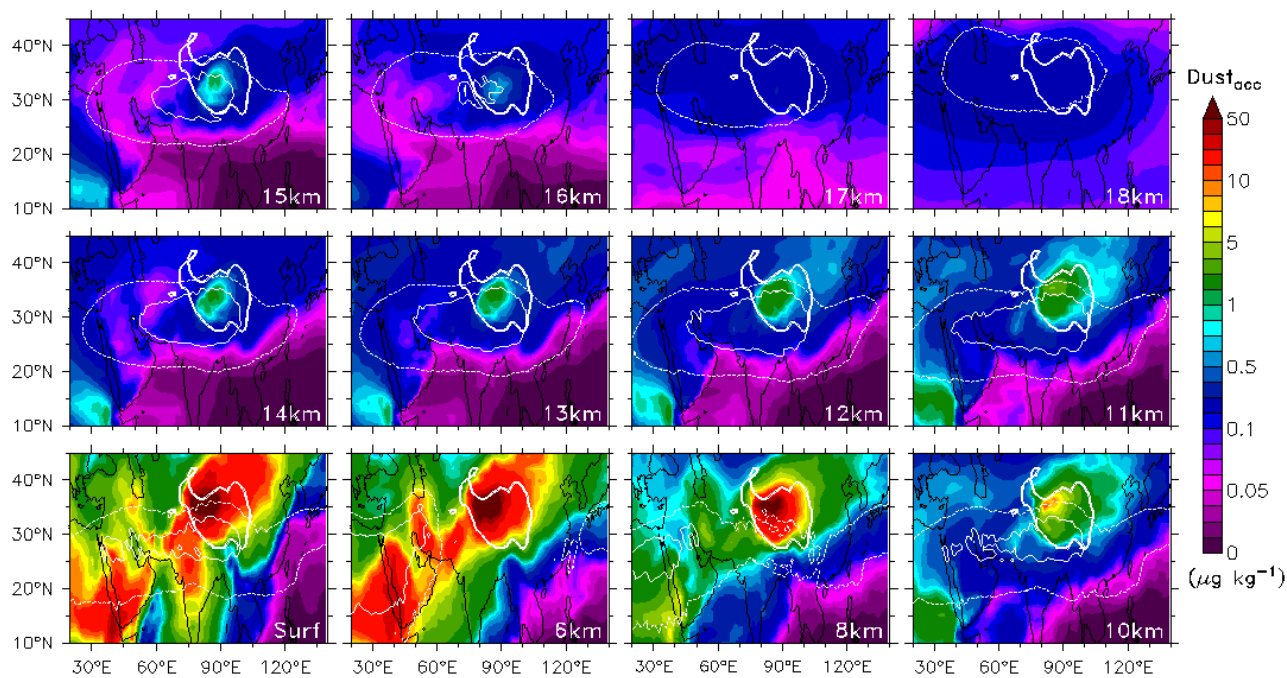

**Figure S10.** Same as Fig. 12, but for the year 2011.

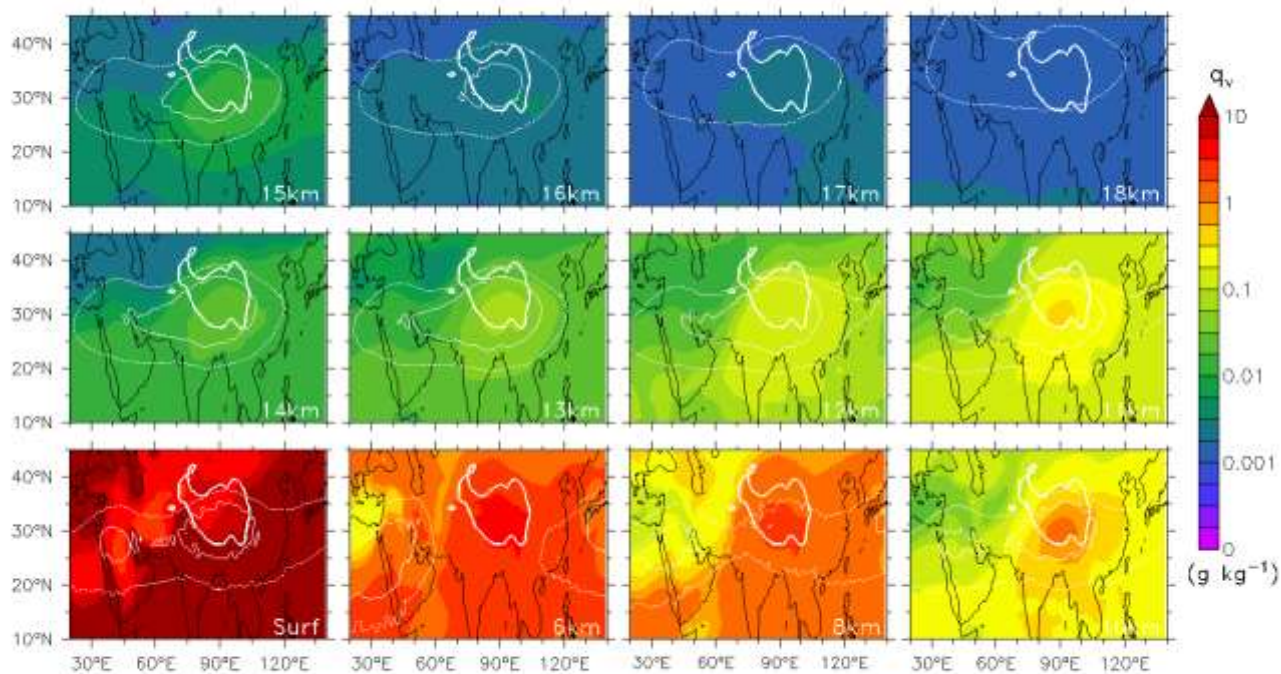

**Figure S11.** Same as Fig. 13, but for the year 2010.

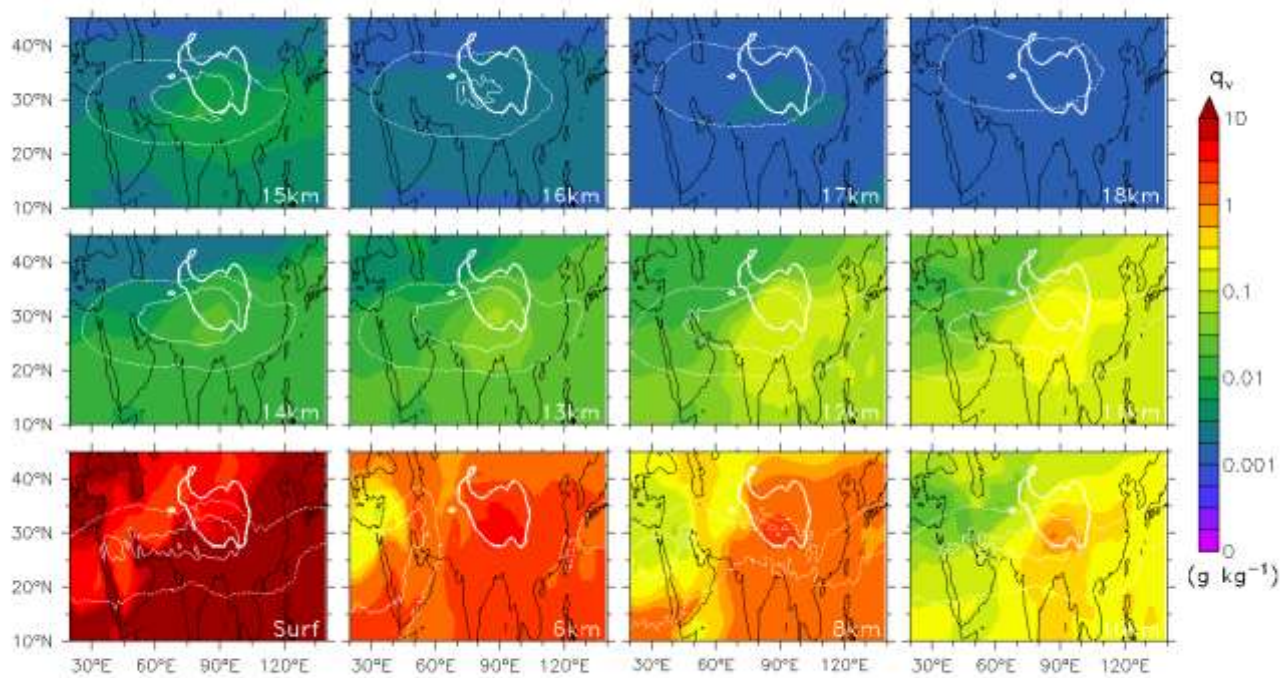

**Figure S12.** Same as Fig. 13, but for the year 2011.



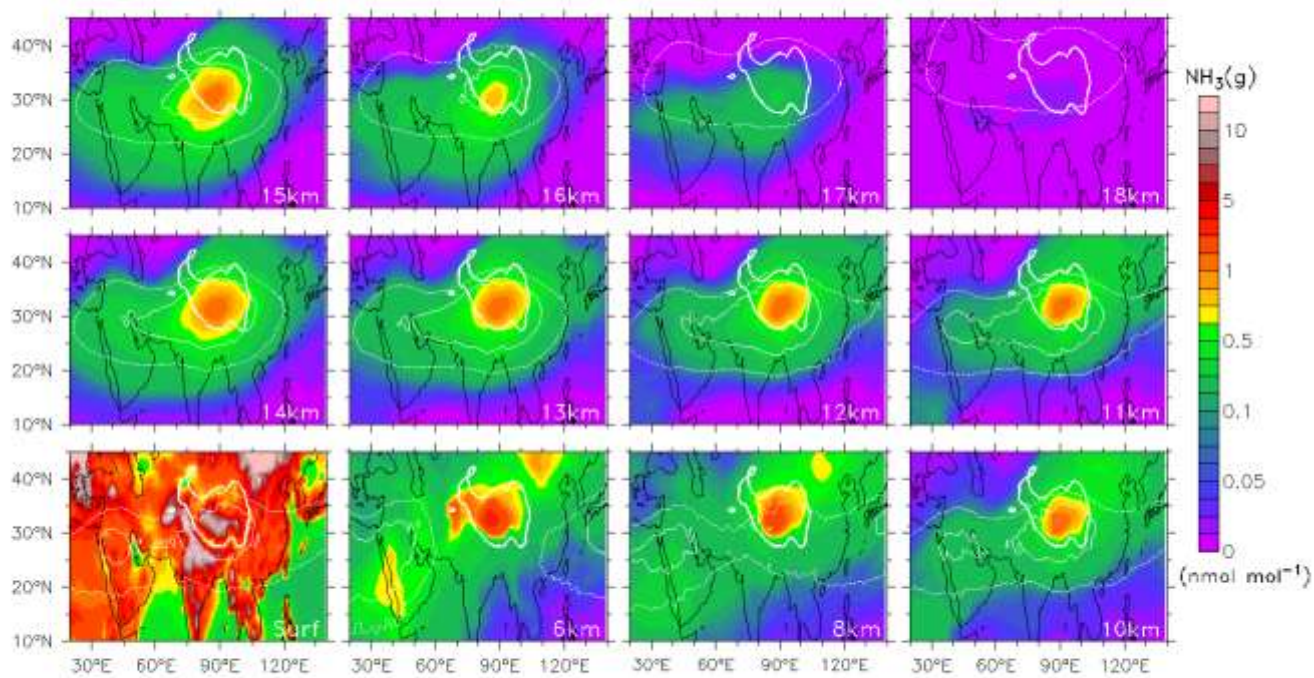

**Figure S13.** Same as Fig. 14, but for the year 2010.



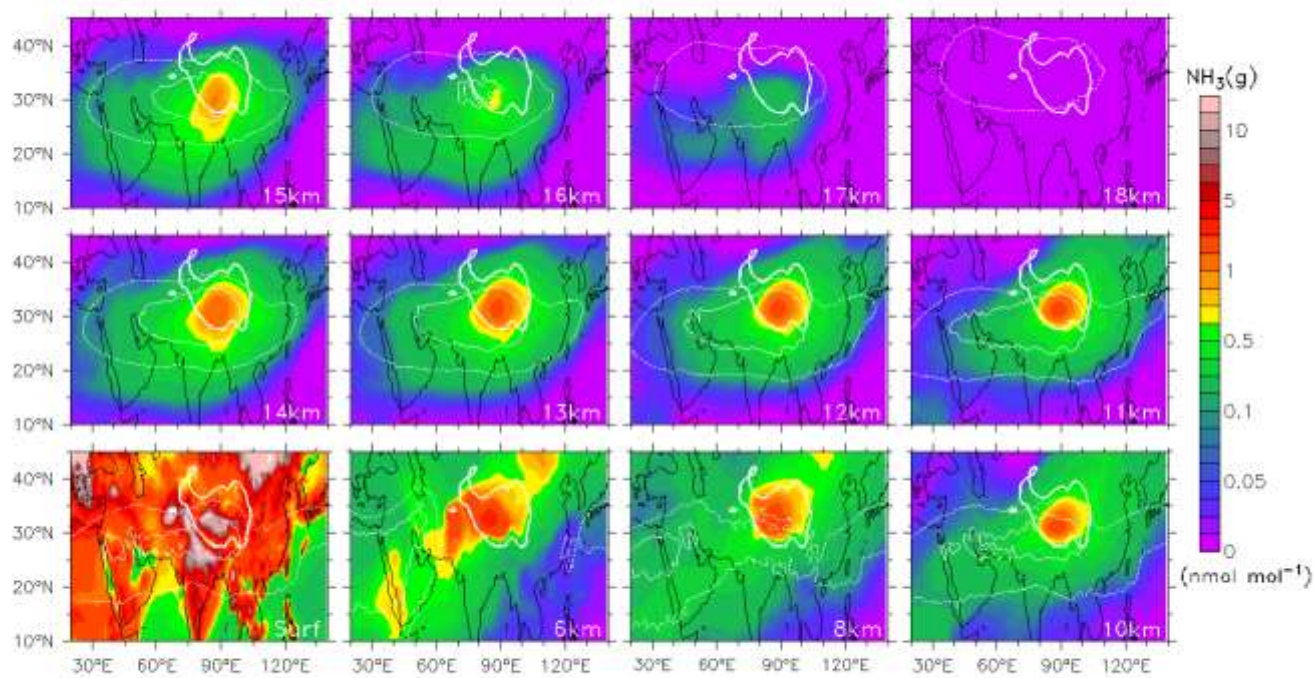

**Figure S14.** Same as Fig. 14, but for the year 2011.
